# Supplementary material
Source: HighWire-hosted journal article supplement (https://www.genetics.org/content/suppl/2007/11/26/genetics.107.078360)
Supplement: genetics.107.078360-3.pdf [file genetics.107.078360-3.pdf]

| Stock  | FRT | Gene Disrupted 1                                  | Gene Disrupted 2                        | Eye Disc Phenotype                                | Ubx cl FLP lethal | Wing Disc Phenotype                  | Notes                           |
|--------|-----|---------------------------------------------------|-----------------------------------------|---------------------------------------------------|-------------------|--------------------------------------|---------------------------------|
| 111111 | 40  | <i>overgrown hematopoietic organs at 23B</i>      |                                         | small, nearly deleted                             | no data           | no data                              |                                 |
| 111114 | 40  | <i>microtubule star</i>                           |                                         | no data                                           | no data           | no data                              |                                 |
| 111141 | 40  | CG14033                                           | <i>thickveins</i>                       | undifferentiated and small                        | no data           | no data                              |                                 |
| 111153 | 40  | <i>abrupt</i>                                     |                                         | deleted                                           | no data           | no data                              |                                 |
| 111227 | 40  | <i>Suppressor of Hairless</i>                     |                                         | nearly wild-type                                  | no                | no data                              |                                 |
| 111230 | 40  | <i>Glycogen phosphorylase</i>                     |                                         | hyperplastic, especially in the antenna           | no                | wild-type with some extra folds      |                                 |
| 111254 | 40  | <i>Eukaryotic initiation factor 3 p40 subunit</i> |                                         | slightly smaller than wild-type, otherwise normal | no                | reduced size, otherwise wild-type    |                                 |
| 111292 | 40  | <i>Coproporphyrinogen oxidase</i>                 |                                         | wild type                                         | yes               | wild-type                            |                                 |
| 111466 | 40  | <i>microtubule star</i>                           |                                         | no data                                           | incomplete        | reduced size, otherwise wild-type    |                                 |
| 111507 | 40  | <i>polypeptide GalNAc transferase 5</i>           |                                         | small neoplastic                                  | incomplete        | reduced size, otherwise wild-type    | Fails to complement <i>lgl</i>  |
| 111563 | 40  | CG9535                                            |                                         | nearly wild- type                                 | incomplete        | overgrown, otherwise wild-type       |                                 |
| 111564 | 40  | <i>Leukocyte-antigen-related-like</i>             |                                         | neoplastic antenna                                | no                | wild-type                            | Fails to complement <i>lgl</i>  |
| 111573 | 40  | <i>Laminin B1</i>                                 |                                         | disorganized antenna                              | yes               | no data                              |                                 |
| 111574 | 40  | CG7277                                            | <i>Chromosome associated protein D3</i> | neoplastic antenna                                | no                | no data                              | Fails to complement <i>lgl</i>  |
| 111585 | 40  | <i>out at first</i>                               |                                         | slight overgrowth, otherwise wild-type            | incomplete        | slight F-actin elevation             |                                 |
| 111586 | 40  | <i>abrupt</i>                                     |                                         | small with normal patterning                      | no data           | no data                              |                                 |
| 111601 | 40  | <i>Rab-protein 5</i>                              | <i>smell impaired 21F</i>               | hyperplastic overgrowth with some neoplasm        | no                | overgrown, otherwise wild-type       | Fails to complement <i>rab5</i> |
| 111604 | 40  | CG5446                                            | CG6388                                  | small neoplastic                                  | yes               | neoplastic                           | Fails to complement <i>lgl</i>  |
| 111610 | 40  | CG31666                                           |                                         | reduced size, otherwise wild-type                 | no                | no data                              |                                 |
| 111636 | 40  | No gene within 3 kb                               |                                         | neoplastic antenna                                | yes               | overgrown, otherwise wild-type       | Fails to complement <i>lgl</i>  |
| 111650 | 40  | CG3164                                            |                                         | smaller, otherwise wild-type                      | yes               | wild-type                            |                                 |
| 111655 | 40  | No gene within 3 kb                               |                                         | disorganized antenna                              | no                | no data                              |                                 |
| 111656 | 40  | <i>kismet</i>                                     |                                         | some disorganization                              | no                | neoplastic regions                   |                                 |
| 111662 | 40  | <i>Receptor of activated protein kinase C 1</i>   |                                         |                                                   | incomplete        | hyperplastic regions                 | Fails to complement <i>lgl</i>  |
| 111669 | 40  | CG10158                                           |                                         | small, nearly deleted                             | no                | wild-type                            |                                 |
| 111672 | 40  | <i>outspread</i>                                  |                                         | slightly larger with neoplastic patches           | no                | overgrowth with some disorganization |                                 |
| 111675 | 40  | <i>Phosphoglycerate kinase</i>                    |                                         | nearly wild-type                                  | no                | wild-type                            |                                 |
| 111681 | 40  | CG9535                                            |                                         | wild-type                                         | no                | reduced size, otherwise wild-type    |                                 |
| 111683 | 40  | <i>Thrombospondin</i>                             |                                         | strong hyperplastic with neoplastic areas         | no                | isolated regions of overgrowth       | Fails to complement <i>lgl</i>  |
| 111696 | 40  | No gene within 3 kb                               |                                         | neoplastic antenna                                | yes               | wild-type                            |                                 |
| 111701 | 40  | CG5973                                            |                                         | mostly wild-type with some neoplastic areas       | incomplete        | some neoplastic patches              |                                 |
| 111705 | 40  | CG5261                                            |                                         | small neoplastic with hyperplastic areas          | no data           | no data                              |                                 |
| 111707 | 40  | <i>Vacuolar H[+]-ATPase SFD subunit</i>           | CG31782                                 | small neoplastic                                  | incomplete        | wild-type with some extra folds      |                                 |
| 111709 | 40  | No gene within 3 kb                               |                                         | neoplastic antenna                                | no                | wild-type with some extra folds      |                                 |
| 111723 | 40  | CG6700                                            |                                         | neoplastic, wild-type size                        | yes               | neoplastic regions                   | Fails to complement <i>lgl</i>  |
| 111725 | 40  | CG11377                                           |                                         | neoplastic antenna                                | no                | strongly neoplastic regions          |                                 |
| 111726 | 40  | No gene within 3 kb                               |                                         | wild-type                                         | no                | no data                              |                                 |
| 111729 | 40  | CG3921                                            | ?                                       | neoplastic                                        | yes               | neoplastic regions                   | Fails to complement <i>lgl</i>  |
| 111735 | 40  | CG10882                                           |                                         | variable hyperplastic and neoplastic              | yes               | wild-type with some extra folds      |                                 |
| 111149 | 42  | <i>patched (ptc)</i>                              |                                         | small with excess folds                           | no data           | no data                              |                                 |
| 111171 | 42  | <i>Heat shock protein cognate 5 (Hsc70-5)</i>     |                                         | hyperplastic antenna                              | incomplete        | wild-type with some extra folds      |                                 |
| 11375  | 42  | <i>mutagen-sensitive 209 (mus209)</i>             |                                         | slightly neoplastic                               | no data           | no data                              |                                 |
| 111682 | 80  | <i>Dynein heavy chain 64C</i>                     |                                         | no data                                           | no data           | no data                              |                                 |
| 111692 | 80  | <i>Blimp-1</i>                                    |                                         | wild-type                                         | no data           | no data                              |                                 |

Table S1: Summary of P-element MENE screen results
